# Supplementary material for: Stabilized calcium phosphate hybrid nanocomposite using a benzoxaborole-containing polymer for pH-responsive siRNA delivery
Source: Royal Society of Chemistry journal article supplement (doi:10.1039/c8bm00575c), 2018-01-01
Supplement: c8bm00575c1.pdf [file c8bm00575c1.pdf]

## Supplementary Information

### **Stabilized calcium phosphate hybrid nanocomposite using a benzoxaborole-containing polymer for pH-responsive siRNA delivery**

Quan Zhou<sup>†</sup>, Yue Wang<sup>†</sup>, Jiajia Xiang, Ying Piao, Zhuxian Zhou<sup>\*</sup>, Jianbin Tang, Xiangrui Liu, and Youqing Shen<sup>\*</sup>

Center for Bionanoengineering and Key Laboratory of Biomass Chemical Engineering of Ministry of Education, College of Chemical and Biological Engineering, Zhejiang University, Hangzhou, China 310007

\*Email: [zhouzx@zju.edu.cn](mailto:zhouzx@zju.edu.cn), [shenyq@zju.edu.cn](mailto:shenyq@zju.edu.cn)

<sup>†</sup>Equal Contributors

**Synthesis of benzoboroxole (BOB).** The compound was synthesized according to the paper reported<sup>1</sup>. In brief, To a cooled (0 °C) suspension of 2-Formylbenzeneboronic acid (5 g, 0.033 mol) in 50 mL CH<sub>3</sub>OH, NaBH<sub>4</sub> (6.3 g, 5 eqs, 0.165 mol) was added slowly and stirred for 1 h. The progress of the reaction was monitored by TLC. Water was added to the mixture at 0°C to stop the reaction and MeOH was evaporated afterward. The mixture was extracted with ethyl acetate (50 mL×3) and washed with brine. The organic layer was dried over anhydrous Na<sub>2</sub>SO<sub>4</sub>, filtered, concentrated and precipitated with hexane. Purification using silica gel column chromatography (ethyl acetate/hexane=1:1) to get pure benzoboroxole (4 g) with a yield of 75%. <sup>1</sup>H-NMR (400 MHz, CDCl<sub>3</sub>) δ 7.77 (d, 1H), 7.50 (ddd, 1H), 7.44 - 7.31 (m, 2H), 5.13 (s, 2H).

**Synthesis of 6-nitrobenzoboroxole.** To a mixture of concentrated HNO<sub>3</sub> and concentrated H<sub>2</sub>SO<sub>4</sub> (v/v=3:2) maintained at precooled ethyl alcohol (-45 °C), BOB (1 g, 7.2 mmol) was added dropwise with fast stirring. The reaction was stirred and maintained at -20°C for 0.5 h. The mixture was poured into ice cube and stirred for another 10 min, the mixture was then extracted with ethyl acetate (50 mL×3) and washed with brine. The organic layer was dried over anhydrous MgSO<sub>4</sub>, filtered, concentrated and precipitated with hexane to get a yellow power (0.6g, 60% yield). <sup>1</sup>H-NMR (400 MHz, CDCl<sub>3</sub>) δ 8.60 (d, 1H), 8.37 (dd, 1H), 7.51 (d, 1H), 5.19 (s, 2H).

**Synthesis of 6-aminobenzoboroxole:** The compound was synthesized by a modified procedure in literature. To a solution of 6-nitrobenzoboroxole (0.5 g, 2.8 mmol) dissolved in a 1:1 mixture of MeOH (10 mL) and 1N HCl (10 mL). 1.826 g (28 mmol) of zinc power was added in portions with vigorous stirring. The reaction was stirred at r.t. for 2 h. When TLC indicated the complete conversion of the starting materials, the precipitate was filtered off and MeOH was evaporated afterward. The mixture was basified using saturated NaHCO<sub>3</sub> and extracted with ethyl acetate (50 mL×3) and washed with brine. The organic layer was dried over anhydrous Na<sub>2</sub>SO<sub>4</sub>, filtered, concentrated and precipitated with hexane to obtain pure 6-aminobenzoboroxole as a white solid with a yield of 75%. <sup>1</sup>H NMR (400 MHz, CDCl<sub>3</sub>) δ 7.14 (d, 1H), 7.02 (t, 1H), 6.85 (dd, 1H), 5.02 (s, 2H), 4.73 (s, 1H), 3.71 (s, 2H).

**Synthesis of 5-acrylamidobenzoboroxole (BOB monomer):** To a solution of 6-aminobenzoboroxole (0.3 g, 2.0 mmol) dissolved in 5 ml THF was added a solution of NaHCO<sub>3</sub> (0.68 g, 8.0 mmol) in 5 mL of water. Acryloyl chloride (200 μL, 2.4 mmol) was added to the solution dropwisely at 0 °C. The reaction was stirred at r.t. for 2 h and THF was evaporated. The suspension was extraction with ethyl acetate followed by washed with saturated NaCl-solution, dried over MgSO<sub>4</sub> and finally evaporated and precipitated to get the BOB monomer (0.35g, 1.7 mmol) as a white power. <sup>1</sup>H NMR (400 MHz, DMSO) δ 10.13 (d, 1H), 9.23 (d, 1H), 8.05 (d, 1H), 7.87 – 7.55 (m, 1H), 7.36 (d, 1H), 6.59 – 6.35 (m, 1H), 6.26 (dd, 1H), 5.76 (dd, 1H), 4.95 (s, 2H).

**RAFT polymerization of PEG-PBO.** mPEG<sub>5k</sub>-CTA was synthesized as the paper reported<sup>2</sup>. mPEG<sub>5k</sub>-CTA (0.3 g, 0.06 mmol), BOB monomer (0.3 g, 25 eqs), AIBN (5 mg, 0.03 mmol) was dissolved in DMF/water (v/v=95/5, 2 mL) in a sealed vial and bubbled with dry N<sub>2</sub> for 30 min. The reaction was carried out at 80 °C for 12 h and quenched by cooling in liquid nitrogen immediately. The reaction mixture was precipitated with cold diethyl ether for three times and the polymer was obtained as a lemon yellow power after drying under vacuum (80% yield).

## Supporting Figures and Tables

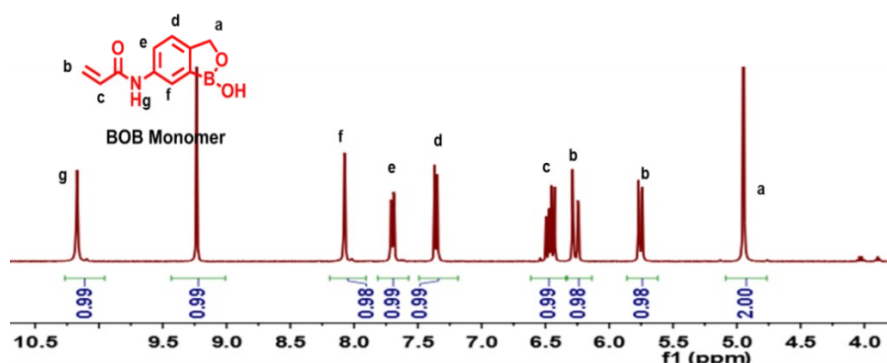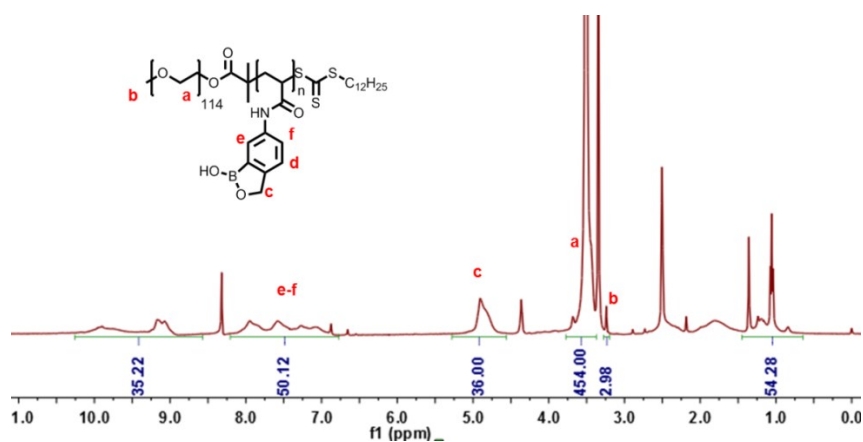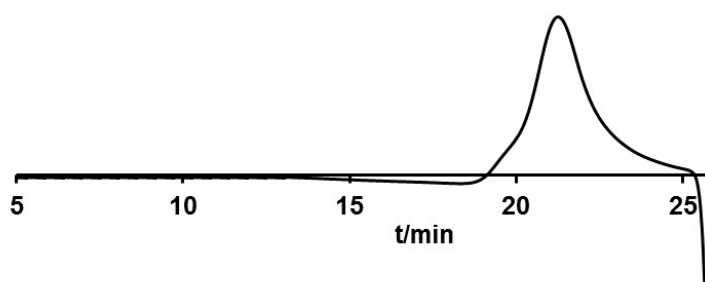

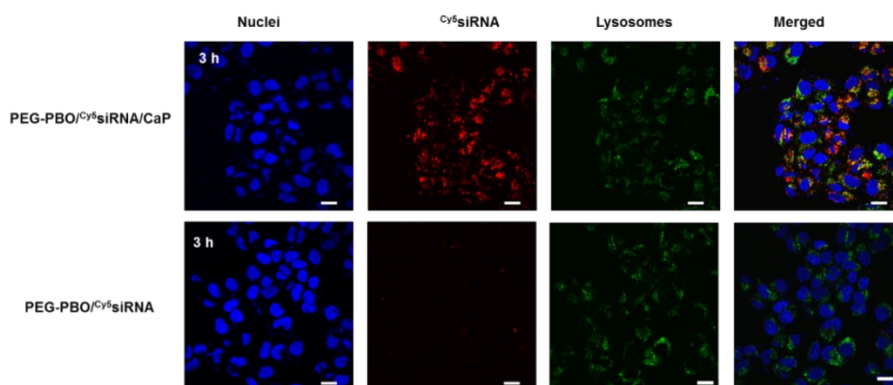

Figure S4. Confocal laser scanning microscopy images of cells cultured with PEG-PBO/ $Cy^5$ siRNA and PEG-PBO/ $Cy^5$ siRNA/CaP hybrid nanoparticles in DMEM medium for 3 h.  $Cy^5$ siRNA is shown in red, lysosomes dyed with LysoTracker red are shown in green, and the cell nuclei stained with Hoechst 33342 are in blue. All scale bars are 20  $\mu$ m.

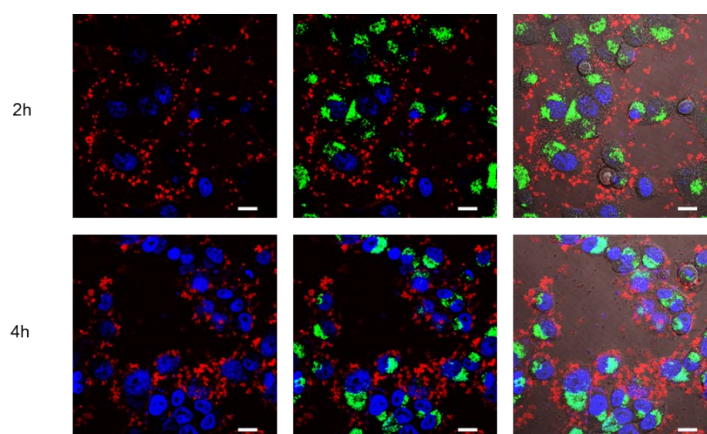

Figure S5. Confocal laser scanning microscopy images of HeLa-luc cells cultured with CaP/ $Cy^5$ siRNA polyplexes in DMEM medium for 2 h or 4 h.  $Cy^5$ siRNA is shown in red, lysosomes dyed with LysoTracker red are shown in green, and the cell nuclei stained with Hoechst 33342 are in blue. All scale bars are 20  $\mu$ m.

## Reference:

1. M. A. Alam, K. Arora, S. Gurrupu, S. K. Jonnalagadda, G. L. Nelson, P. Kiprof, S. C. Jonnalagadda and V. R. Mereddy, *Tetrahedron*, 2016, **72**, 3795-3801.
2. Y. C. Zhou, F. T. Huang, Y. Yang, P. L. Wang, Z. Zhang, Y. N. Tang, Y. Q. Shen and K. Wang, *Small*, 2018, **14**, 12.
